# Supplementary material for: Forensic electrochemistry: the electroanalytical sensing of Rohypnol® (flunitrazepam) using screen-printed graphite electrodes without recourse for electrode or sample pre-treatment
Source: Royal Society of Chemistry journal article supplement (doi:10.1039/c3an01352a), 2013-01-01

# Forensic Electrochemistry: The Electroanalytical Sensing of Rohypnol® (Flunitrazepam) using Screen-Printed Graphite Electrodes without Recourse for Electrode or Sample Pre-treatment

Jamie P. Smith, Jonathan P. Metters, Dimitrios K. Kampouris, Carlos Lledo-Fernandez,  
Oliver B. Sutcliffe and Craig E. Banks \*

*Faculty of Science and Engineering, School of Chemistry and the Environment,  
Division of Chemistry and Environmental Science, Manchester Metropolitan  
University, Chester Street, Manchester M15GD, Lancs, UK*

## Electronic Supplementary Information

\*To whom correspondence should be addressed.

Email: [c.banks@mmu.ac.uk](mailto:c.banks@mmu.ac.uk); Tel: ++(0)1612471196; Fax: ++(0)1612476831

Website: [www.craigbanksresearch.com](http://www.craigbanksresearch.com)

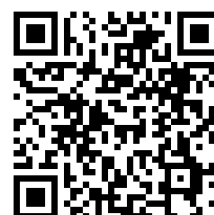

### ESI figure 1

Cyclic voltammetric responses obtained in pH 6 phosphate buffer solution in the absence (dotted line) and presence (solid line) of  $0.3 \mu\text{g mL}^{-1}$  7-aminoflunitrazepam using a SPE.

Scan rate:  $100 \text{ mV s}^{-1}$

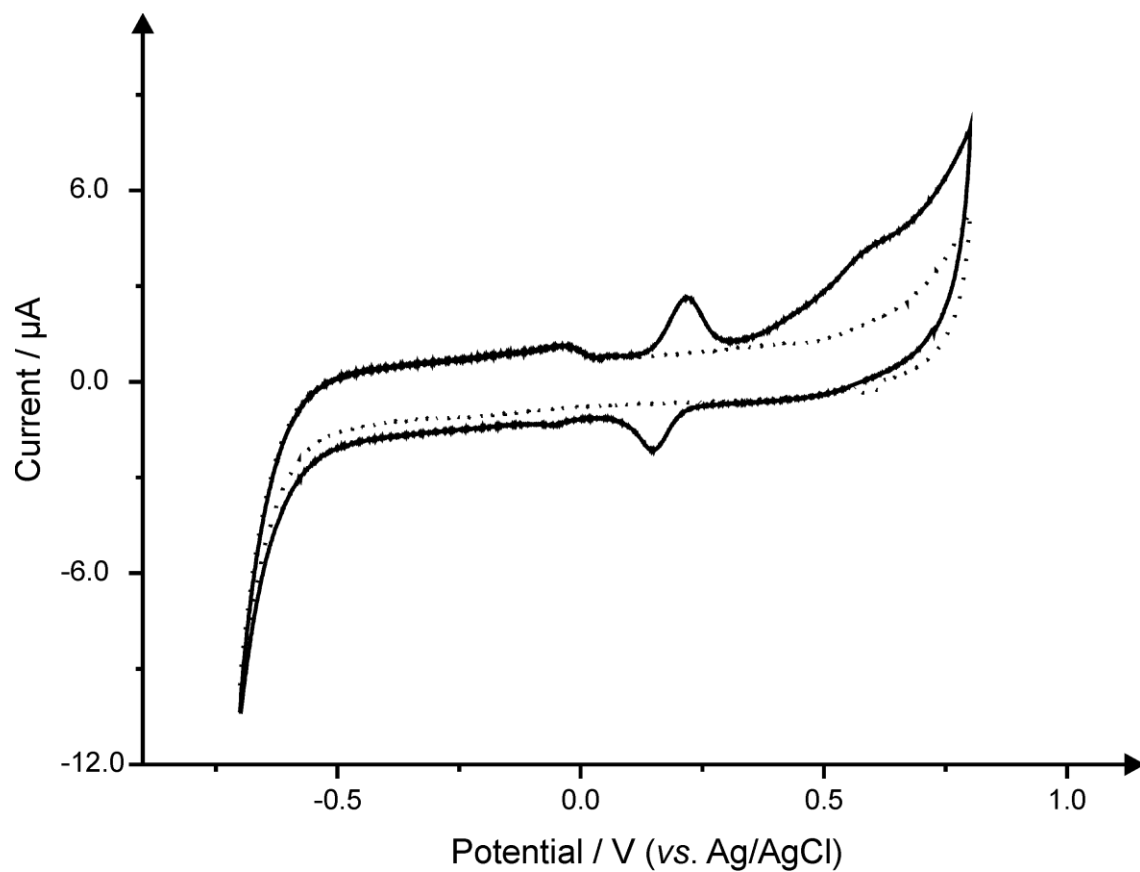

Supplement: c3an01352a.pdf [file c3an01352a.pdf]
